# Supplementary material
Source: MDPI journal article supplement (https://www.mdpi.com/2073-4441/14/9/1447)
Supplement: s1 [file s1]

Article

# Is Aquaponics Beneficial in Terms of Fish and Plant Growth and Water Quality in Comparison to Separate Recirculating Aquaculture and Hydroponic Systems?

Faiqa Atique <sup>1,3,2</sup> Petra Lindholm-Lehto <sup>3,\*</sup> and Juhani Pirhonen <sup>1</sup>

<sup>1</sup> University of Jyväskylä, Department of Biological and Environmental Science, P.O. Box 35, FI-40014, University of Jyväskylä, Finland; atiquefaiqa@gmail.com (F.A.); juhani.pirhonen@jyu.fi (J.P.)

<sup>2</sup> JAMK University of Applied Sciences, Institute of Bioeconomy, Tuumalantie 17, FI-43130 Tarvaala, Finland

<sup>3</sup> Natural Resources Institute Finland, Aquatic Production Systems, Surfontie 9A, FI-40500 Jyväskylä, Finland

\* Correspondence: petra.lindholm-lehto@luke.fi

## Supplementary materials

**Supplementary Table S1.** Limits of detection (LOD), limits of quantification (LOQ) for micronutrients (mg/kg dm) Fe, Cu, Mn, Zn, B and macronutrients (g/kg dm) N, P, K, Ca, Mg, S for ICP-OES and ICP -OES methods.

| Element | LOD  |       | LOQ   |       |
|---------|------|-------|-------|-------|
| B       | 1.90 | mg/kg | 5.80  | mg/kg |
| Ca      | 0.30 | g/kg  | 0.80  | g/kg  |
| Cu      | 1.70 | mg/kg | 5.00  | mg/kg |
| Fe      | 1.70 | mg/kg | 5.00  | mg/kg |
| K       | 0.20 | g/kg  | 0.70  | g/kg  |
| Mg      | 0.03 | g/kg  | 0.10  | g/kg  |
| Mn      | 1.00 | mg/kg | 2.70  | mg/kg |
| P       | 0.03 | g/kg  | 0.10  | g/kg  |
| Zn      | 7.10 | mg/kg | 20.00 | mg/kg |
| N       | 0.70 | g/kg  | 1.60  | g/kg  |
| S       | 0.07 | g/kg  | 0.20  | g/kg  |

**Supplementary Table S2.** Limits of detection (LOD), limits of quantification (LOQ), and linearity (R<sub>2</sub>) of selected standard solutions (1-100 mg/L) for HPIC analysis of anions.

| Anion                         | LOD  | LOQ  | Linearity (R <sub>2</sub> ) |
|-------------------------------|------|------|-----------------------------|
| CL <sup>-</sup>               | 0.05 | 0.10 | 0.99                        |
| NO <sub>2</sub> <sup>-</sup>  | 0.13 | 0.14 | 0.99                        |
| NO <sub>3</sub> <sup>-</sup>  | 0.10 | 0.18 | 0.99                        |
| SO <sub>4</sub> <sup>2-</sup> | 0.05 | 0.06 | 0.99                        |
| PO <sub>4</sub> <sup>3-</sup> | 0.02 | 0.02 | 0.99                        |
